# Supplementary material
Source: PubMed Central journal article supplement (PMC4911882)
Supplement: jcav07p1142s1.pdf [file jcav07p1142s1.pdf]

## **Liver Label Retaining Cancer Cells Are Relatively Resistant to the Reported Anti-Cancer Stem Cell Drug Metformin**

Hong-Wu Xin<sup>1</sup> \*<sup>2,§</sup>, Chenwi M. Ambe<sup>2</sup> \*, Tyler C. Miller<sup>2</sup>, Jin-Qiu Chen<sup>3</sup>, Gordon W. Wiegand<sup>2</sup>, Andrew J. Anderson<sup>2</sup>, Satyajit Ray<sup>2</sup>, John E. Mullinax<sup>2</sup>, Danielle M. Hari<sup>2</sup>, Tomotake Koizumi<sup>2</sup>, Jessica D. Godbout<sup>2</sup>, Paul K. Goldsmith<sup>3</sup>, Alexander Stojadinovic<sup>5</sup>, Udo Rudloff<sup>2</sup>, Snorri S. Thorgeirsson<sup>4, §</sup>, Itzhak Avital<sup>2,6, §</sup>

<sup>1</sup>Laboratory of Molecular Oncology, Key Laboratory of Carcinogenesis and Translational Research (Ministry of Education), Peking University Cancer Hospital and Institute, Beijing 100142, China; <sup>2</sup>Surgery Branch, <sup>3</sup>Collaborative Protein Technology Resource, <sup>4</sup>Laboratory for Experimental Carcinogenesis, Center for Cancer Research, National Cancer Institute, National Institutes of Health, Bethesda, MD 20892, USA; <sup>5</sup>Department of Surgery, Uniformed Services University of the Health Sciences, Bethesda, MD; <sup>6</sup>Bon Secours Cancer Institute, Richmond, VA 23230

**Supplemental Figure legends:**

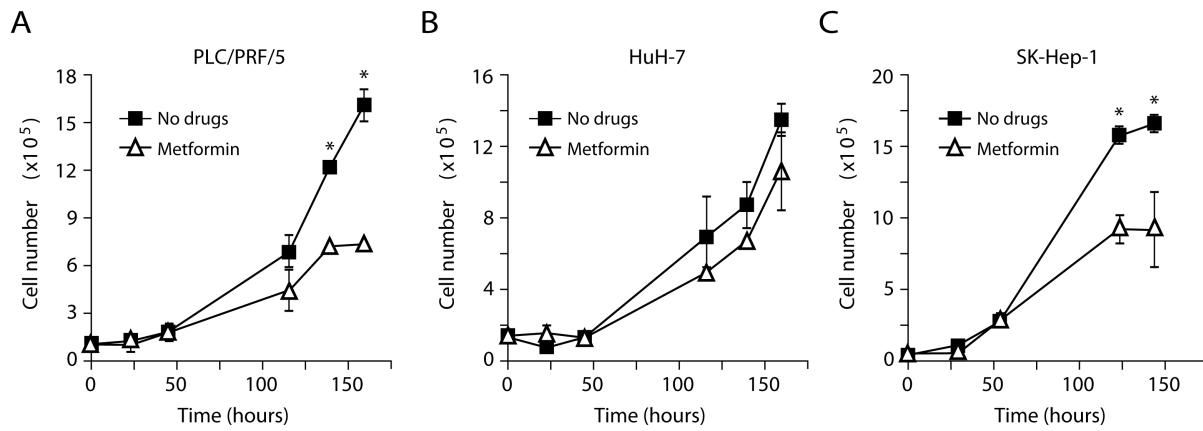

**Supplemental Figure S1. Metformin effectively inhibit cell growth of tested two out of three HCC cell lines after 48 hours of treatment.** Growth curves of HCC cell lines treated with and without metformin (A) PLC/PRF/5 ( $p=1.11e-2$ ), (B) HuH-7 ( $p=0.32$ ), and (C) SK-Hep-1 ( $p=0.012$ ).

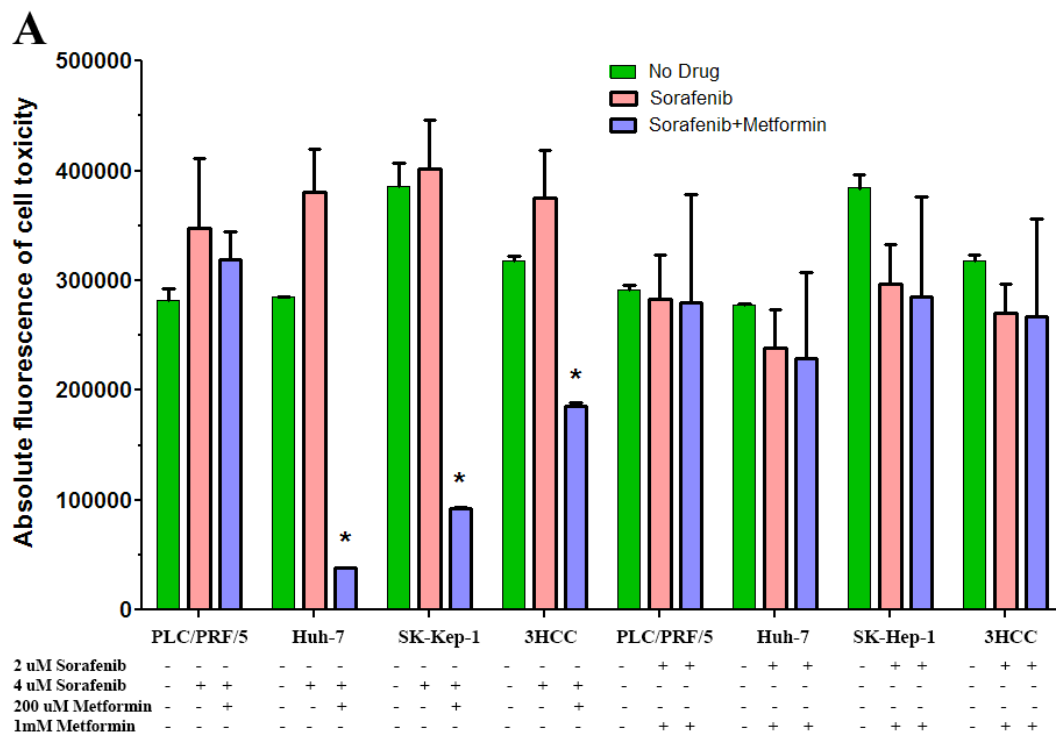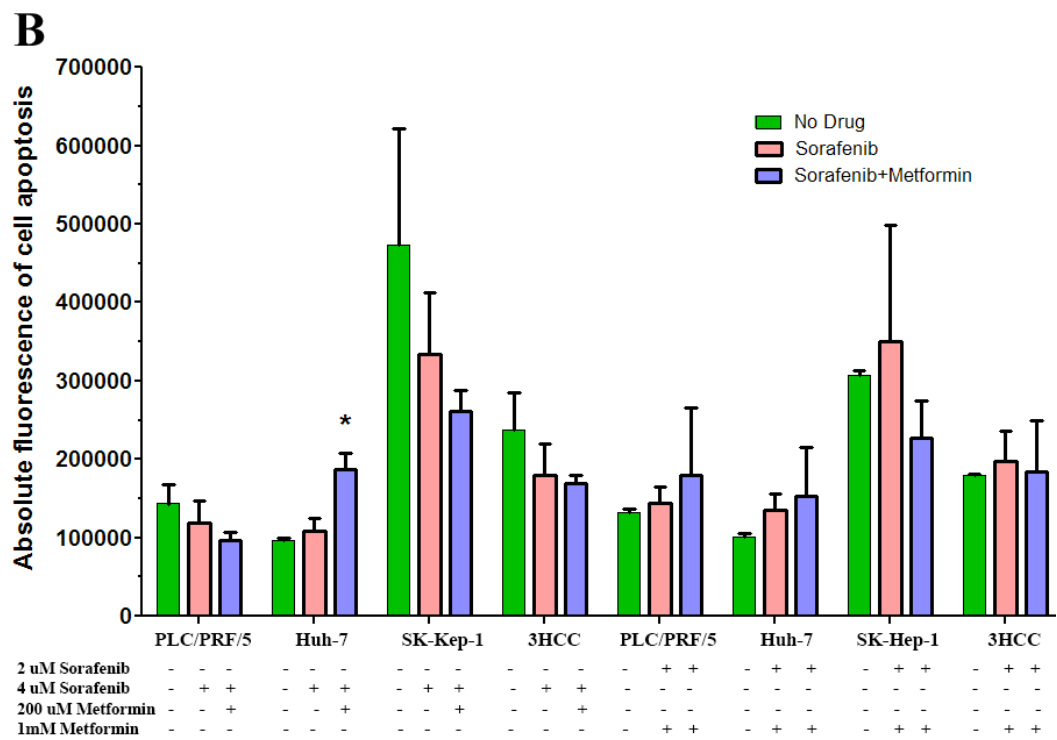

**Supplemental Figure S2. Toxicity and apoptosis of HCC cells treated with metformin or/and sorafenib**

(A) Toxicity and (B) apoptosis of HCC cells treated with metformin or/and sorafenib.

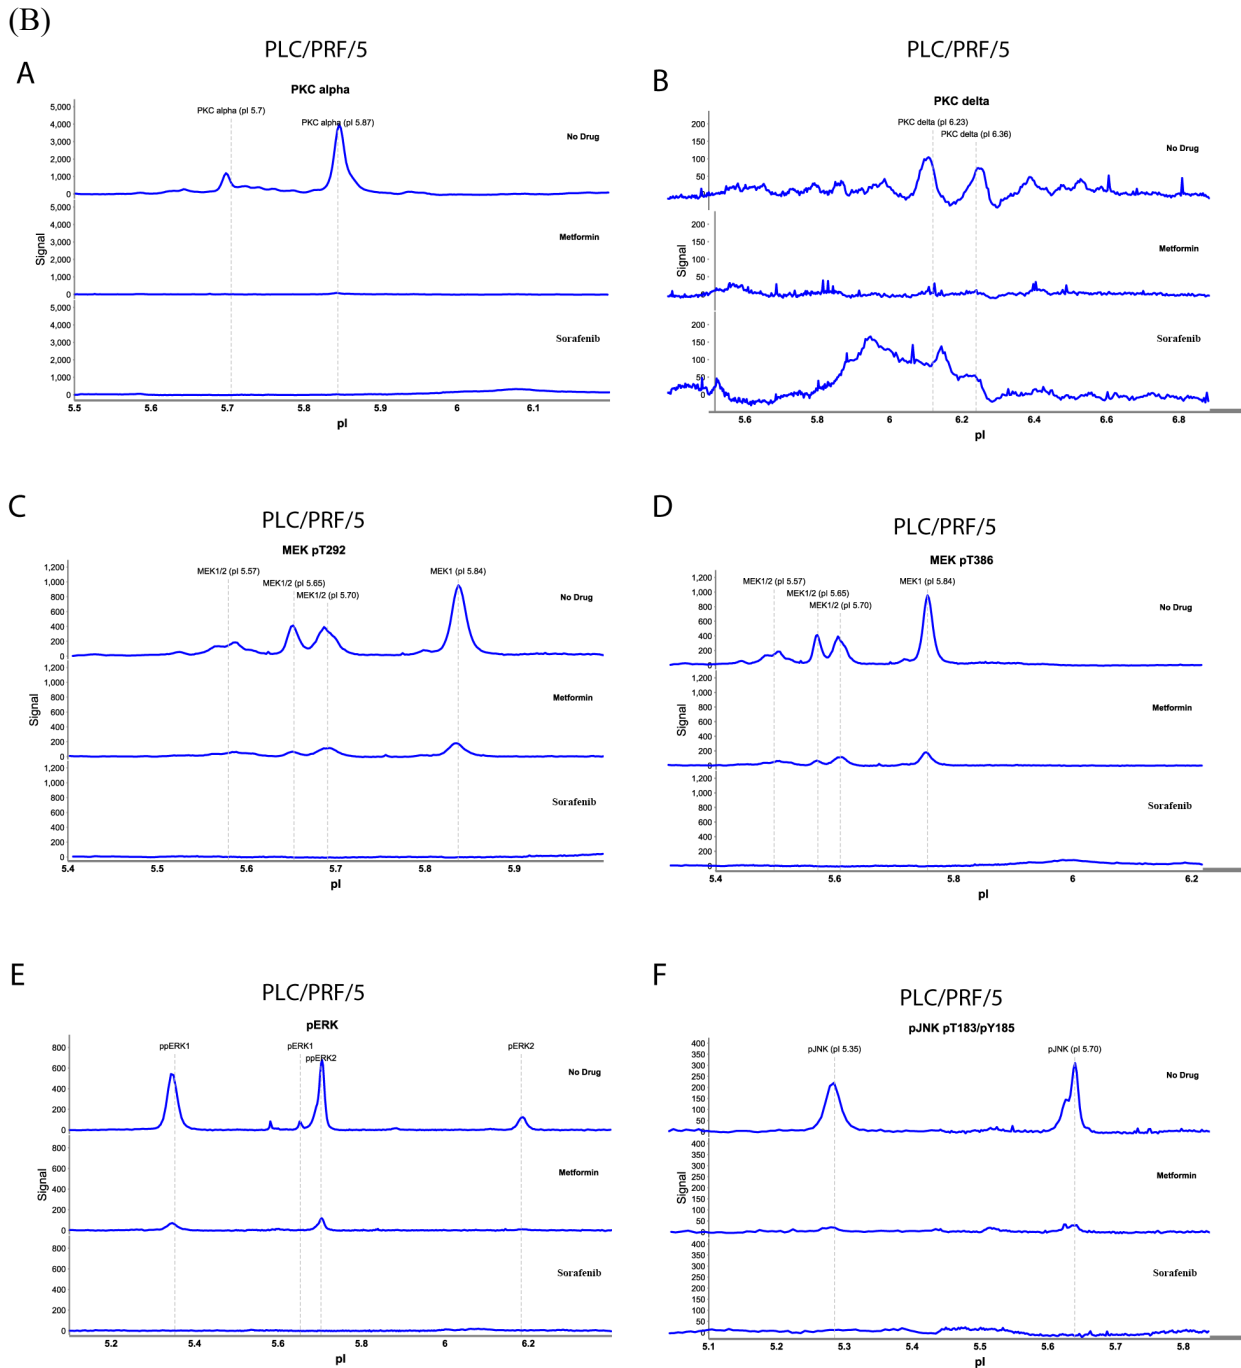

**Supplemental Figure S3. Metformin inhibited phosphorylation of PKC-alfal/delta, MEK1/2, ERK1/2 and JNK1/2 in PLC/PRF/5 cells.**

After treatment with metformin phosphorylation of multiple protein kinases were inhibited in PLC/PRF/5 cells: **(A)** PKC-alfal, **(B)** PKC-delta, **(C)** MEK1/2 (pT292), **(D)** MEK1/2 (pT386), **(E)** ERK1/2 and **(F)** JNK1/2.

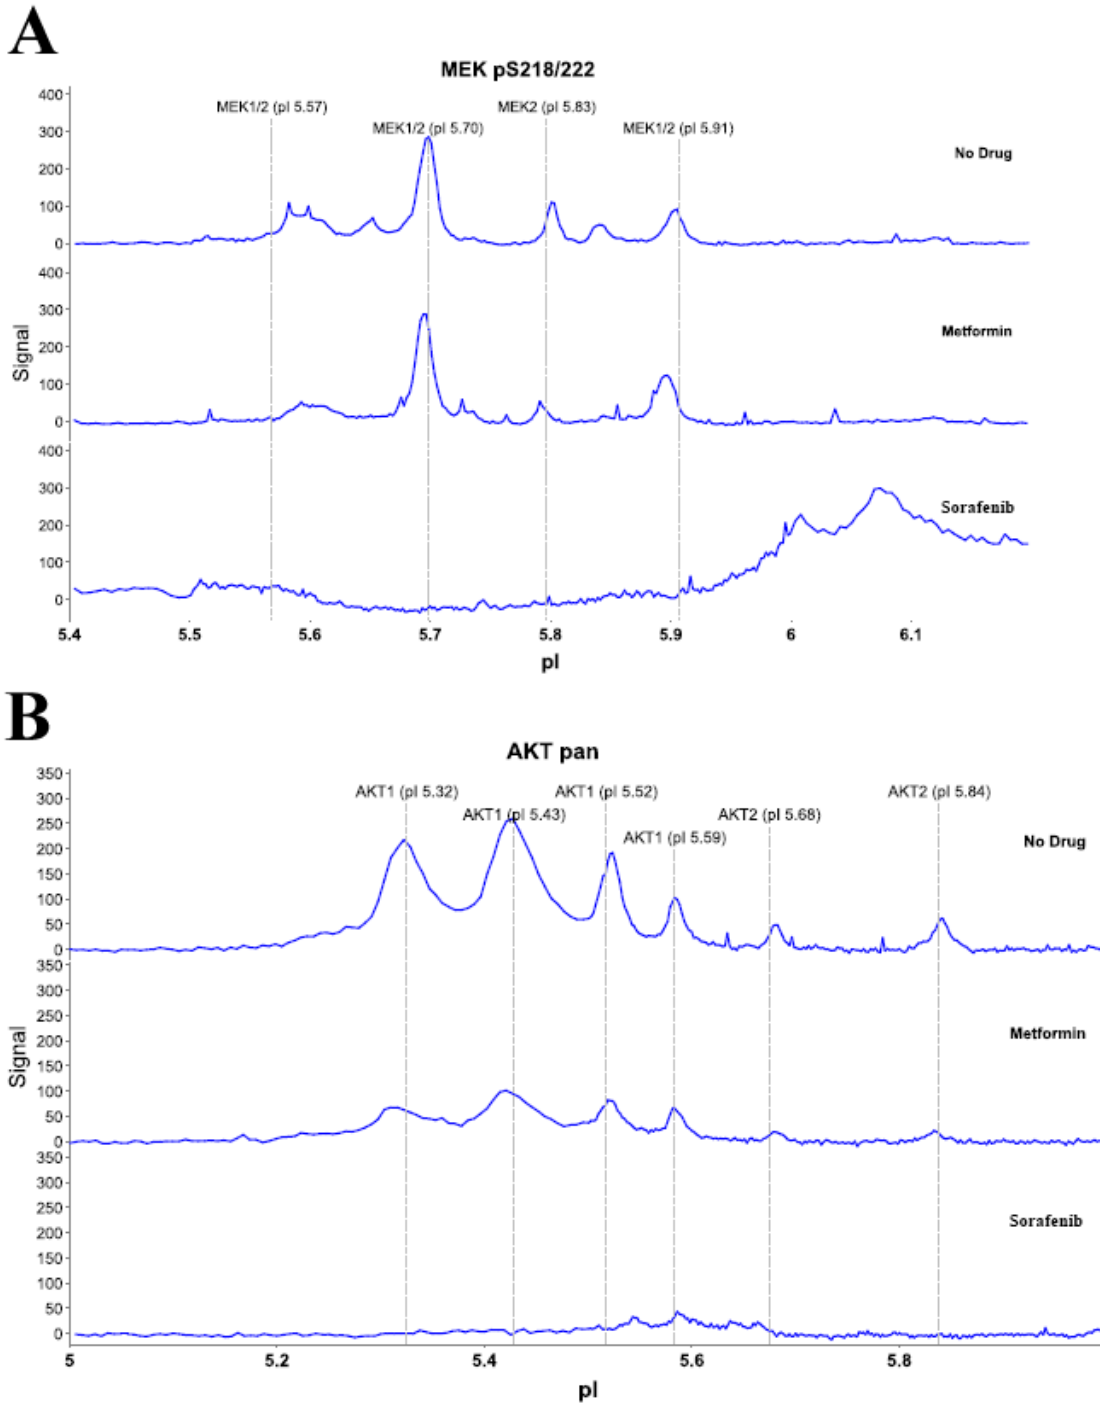

**Supplemental Figure S4. Metformin had no significant effects on phosphorylation of MEK1/2 and AKT1/2 in PLC/PRF/5 cells.**

After treatment with metformin phosphorylation of multiple protein kinases were inhibited in PLC/PRF/5 cells: **(A)** MEK1/2 (pS218/222) and **(B)** AKT1/2.

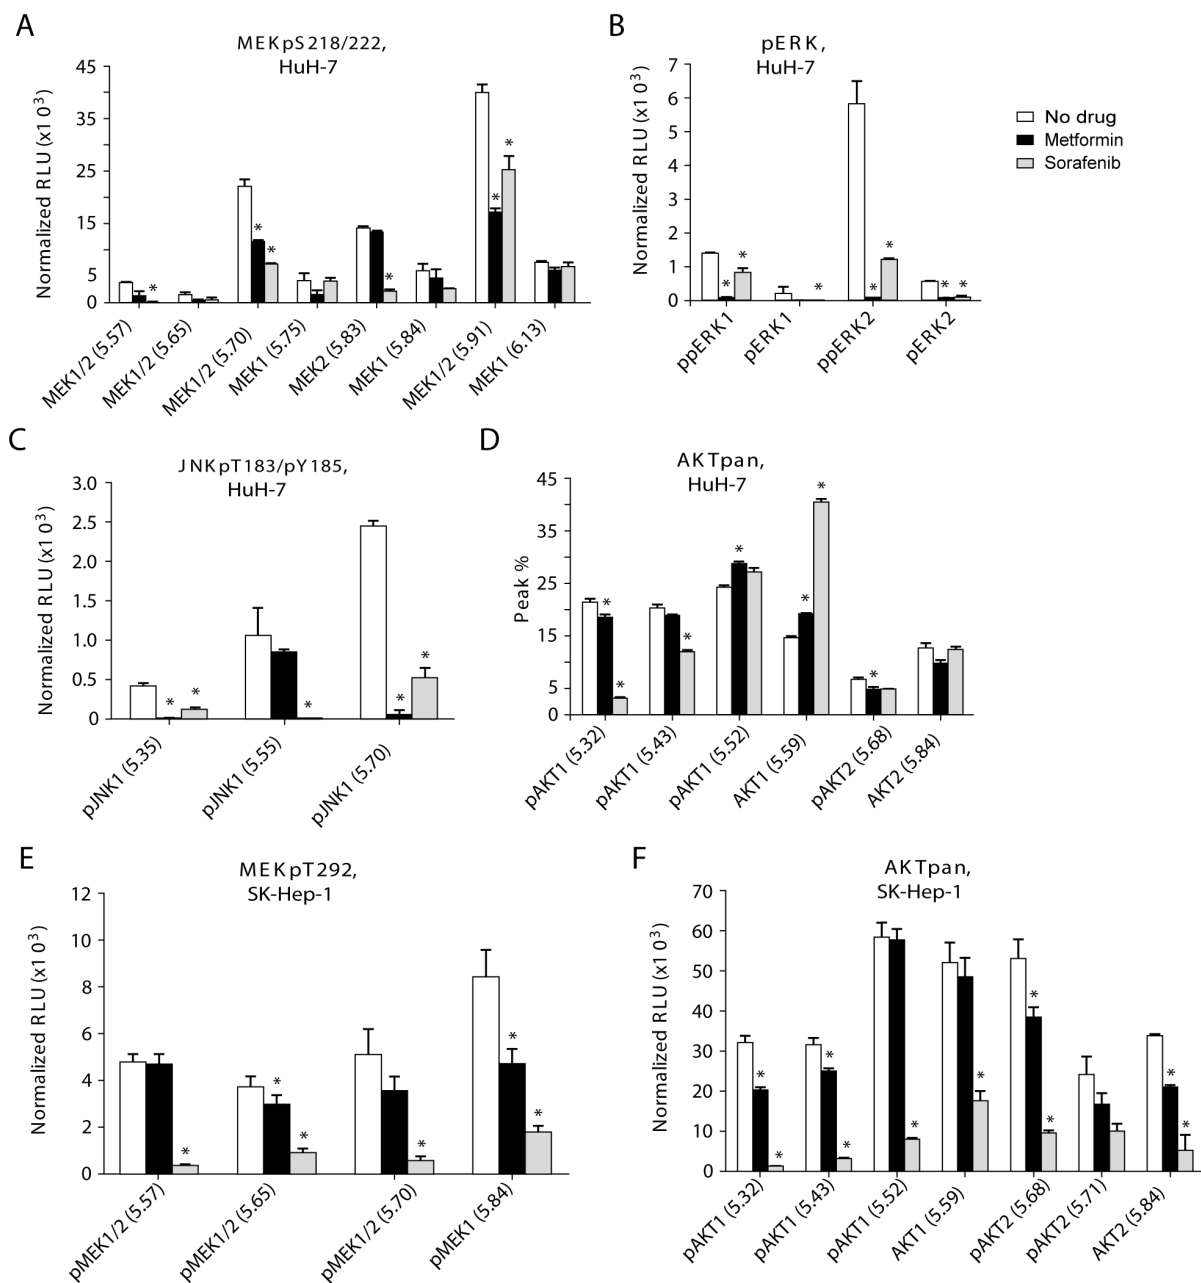

**Supplemental Figure S5. MEK1/2, ERK1/2, JNK1/2 and AKT1/2 are inhibited in HuH-7 and SK-Hep-1 cells after treatment with metformin**

After treatment with metformin phosphorylation of multiple protein kinases were inhibited in HuH-7 cells: **(A)** MEK1/2 (pS218/222), **(B)** ERK1/2, **(C)** JNK1/2 and **(D)** AKT1/2; and in SK-Hep-1 cells: **(E)** MEK1/2 (pT292) and **(F)** AKT1/2.

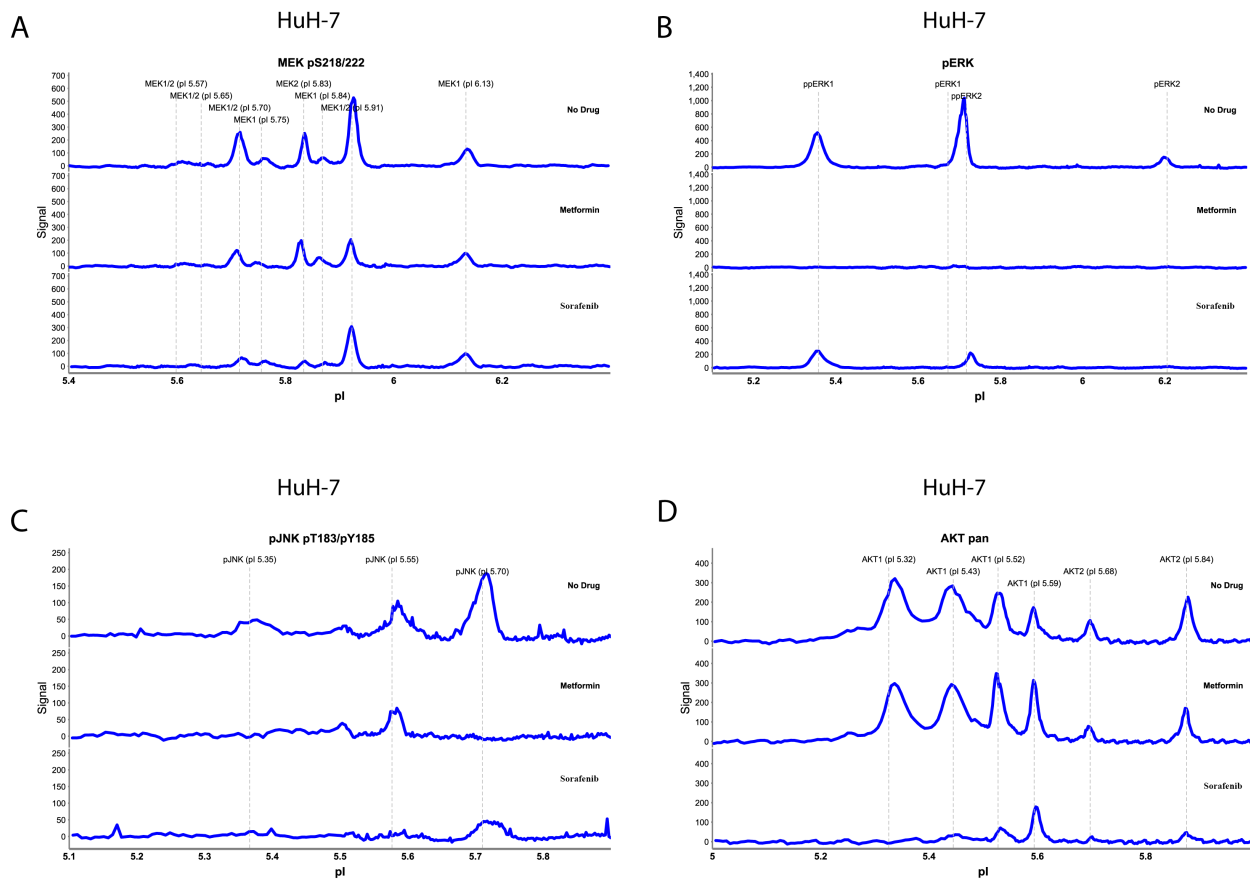

**Supplemental Figure S6. Metformin inhibited phosphorylation of MEK1/2, ERK1/2 and JNK1/2 and AKT1/2 in HuH-7 cells.**

After treatment with metformin phosphorylation of multiple protein kinases were inhibited in HuH-7 cells:

**(A)** MEK1/2 (pS218/222), **(B)** ERK1/2, **(C)** JNK1/2 and **(D)** AKT1/2.

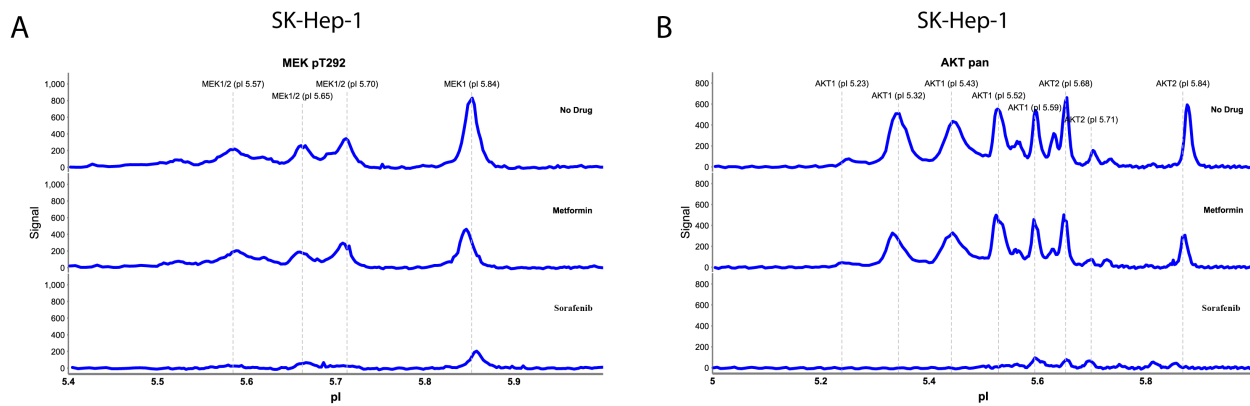

**Supplemental Figure S7. Metformin inhibited phosphorylation of MEK1/2 and AKT1/2 in SK-Hep-1 cells.**

After treatment with metformin phosphorylation of multiple protein kinases were inhibited in SK-Hep-1 cells: **(A)** MEK1/2 (pT292) and **(B)** AKT1/2.



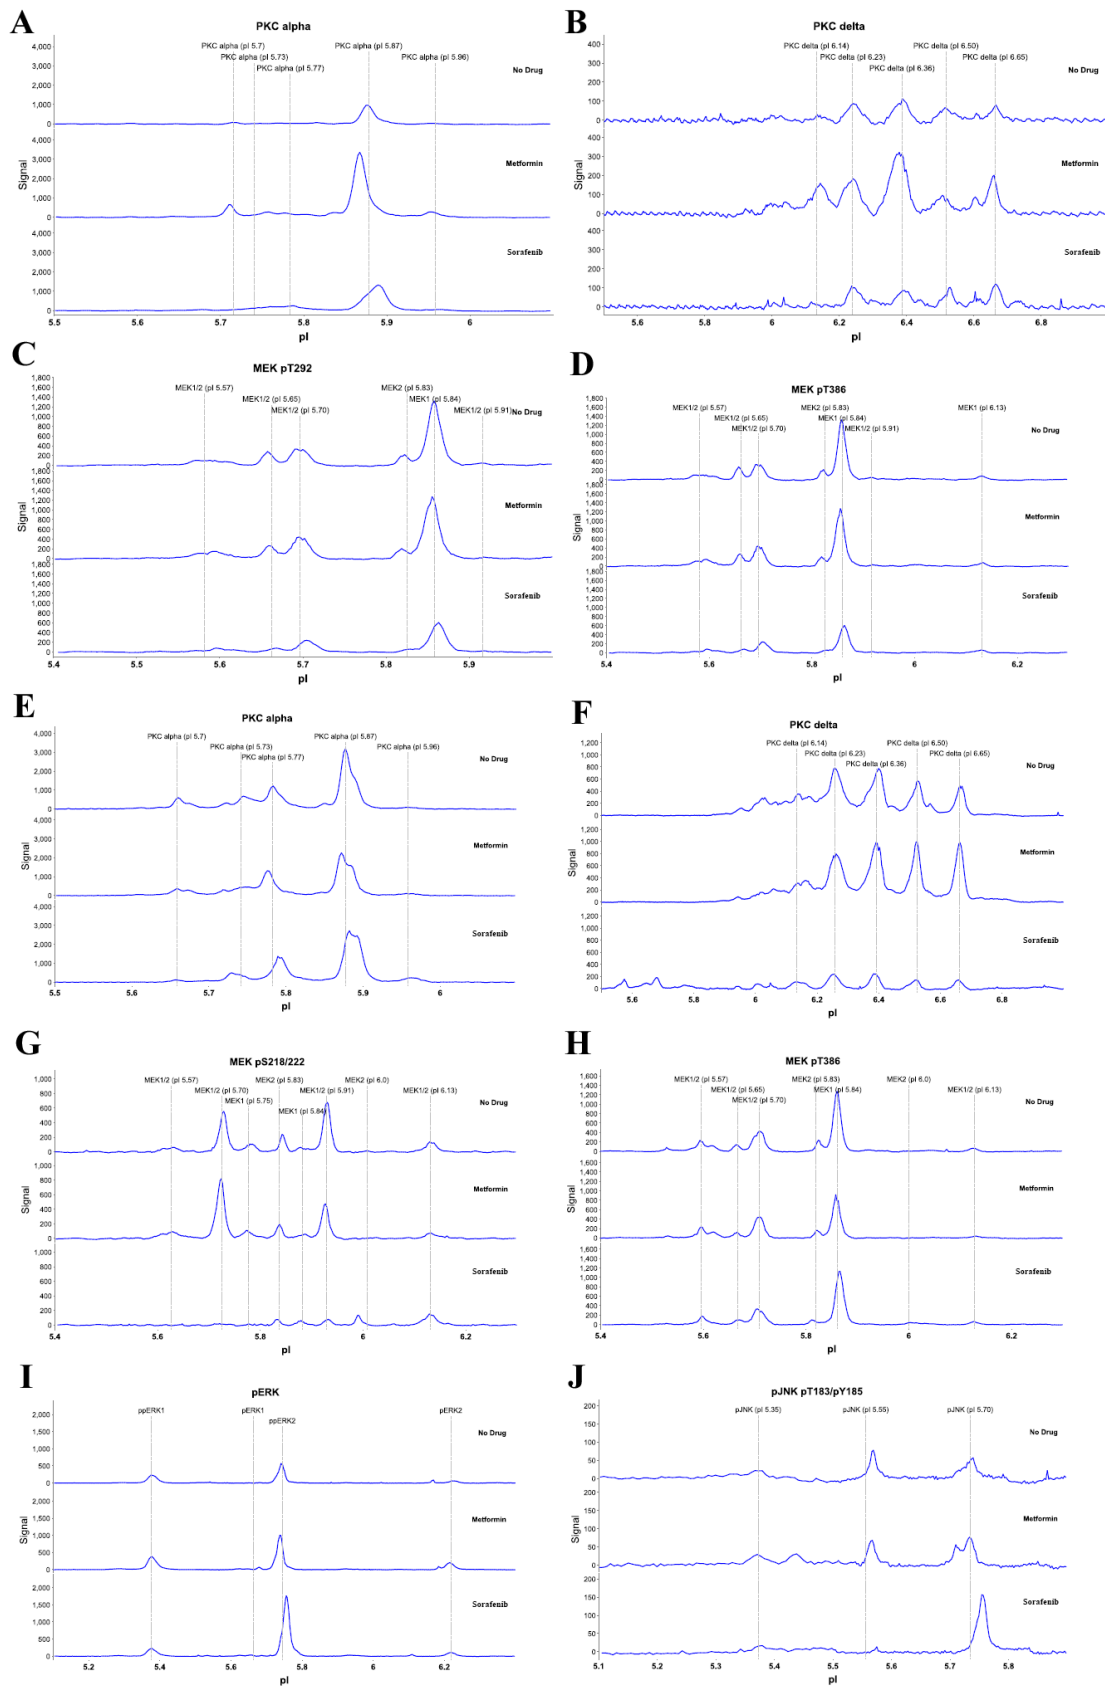

**Supplemental Figure S8. Metformin had no significant effects on phosphorylation of some STP in HuH-7 and SK-Hep-1 cells.**

After treatment with metformin phosphorylation of multiple protein kinases were not significantly affected in HuH-7 cells: **(A)** PKC- $\alpha$ , **(B)** PKC- $\delta$ , **(C)** MEK1/2 (pT292), **(D)** MEK1/2 (pT386); and SK-Hep-1 cells: **(E)** PKC- $\alpha$ , **(F)** PKC- $\delta$ , **(G)** MEK1/2 (pS218/222), **(H)** MEK1/2 (pT386), **(I)** ERK1/2 and **(J)** JNK1/2.

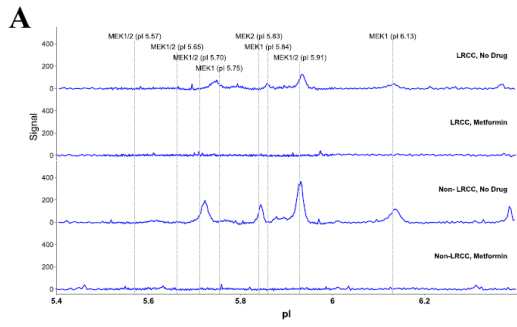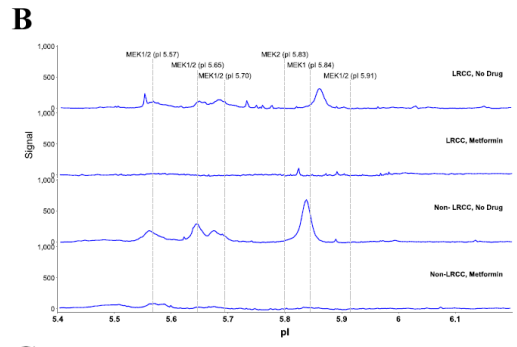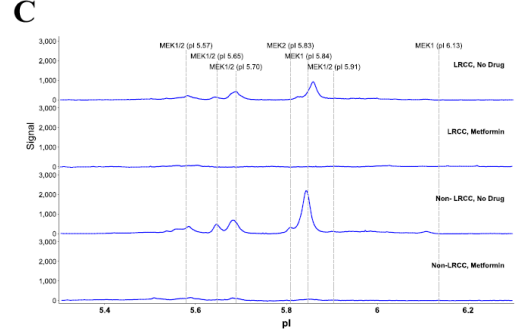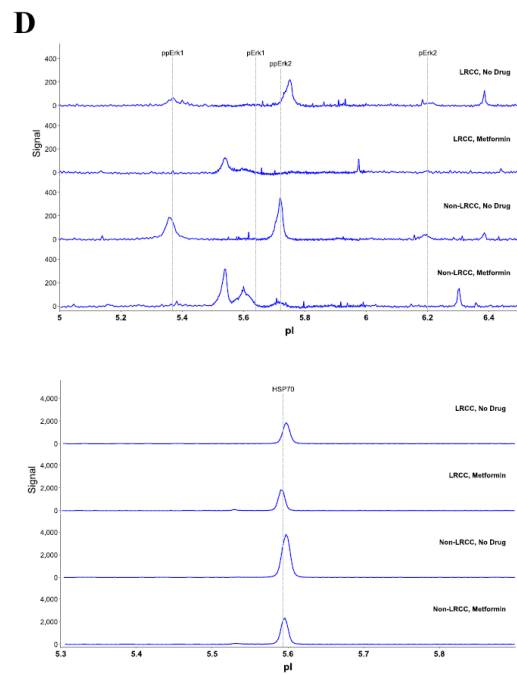

**Supplemental Figure S9. Metformin inhibited phosphorylation of MEK1/2 and ERK1/2 in LRCC and non-LRCC of PLC/PRF/5 and HuH-7 cells.**

After treatment with metformin phosphorylation of multiple protein kinases were inhibited in both LRCC and non-LRCC: **(A)** MEK1/2 (pS218/222), **(B)** MEK1/2 (pT292), **(C)** MEK1/2 (pT386), **(D)** ERK1/2 in PLC/PRF/5 and HuH-7 cells. **(E)** Head shock protein 70 control.

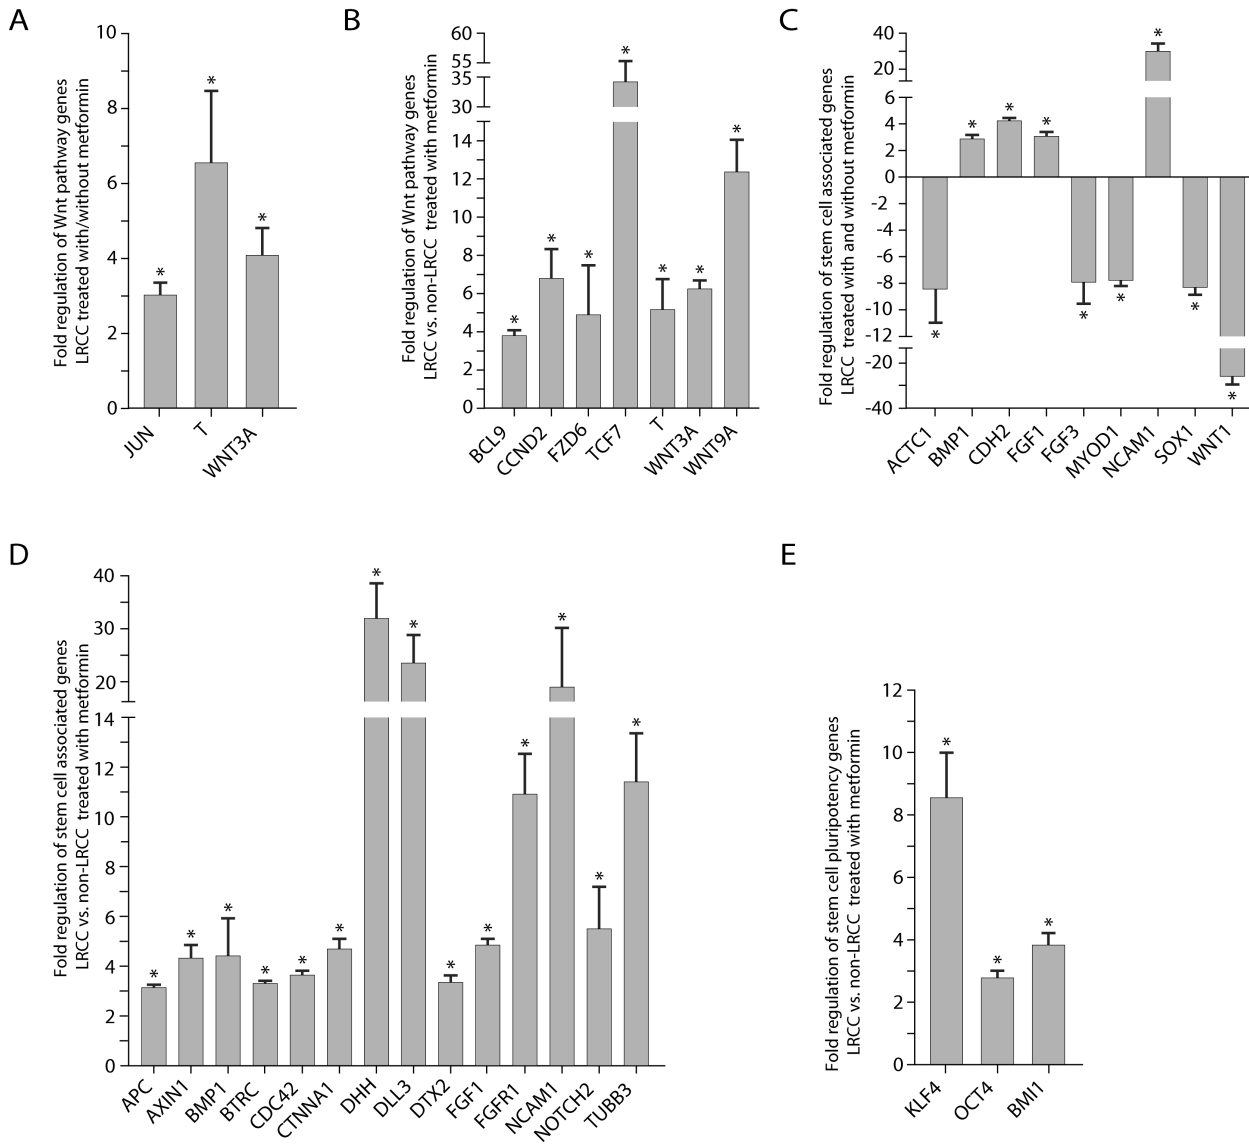

Supplemen

**tal Figure S10. Metformin promoted phosphorylation of the major highly phosphorylated specie of AKT1/2 only in LRCC of PLC/PRF/5 cells.**

**(A-B)** After treatment with metformin phosphorylation of the major highly phosphorylated specie of AKT1/2 was promoted only in LRCC.

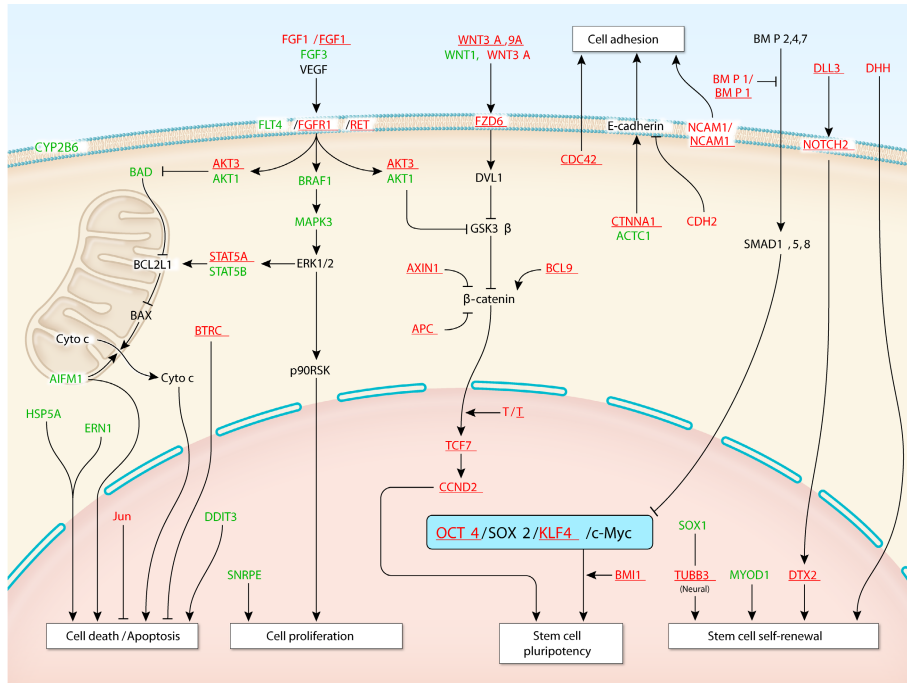

### Supplemental Figure S11. A pathway map for metformin treated LRCC

Ingenuity Pathway Analysis of gene expression data. Red/green: up-and-down-regulation, respectively; underlines: LRCC vs. non-LRCC; The map suggests a potential less proliferative, more metastatic and less differentiated with less cell death/apoptosis expression profile for metformin treated LRCC.

## Supplemental Table

**Supplementary Table S1. Gene expression affected by metformin in different HCC cell lines. P value**  
was calculated by two-tailed t test.

| Gene group                   | Comparison                               | Gene          | PLC/PRF/5 |          | HuH-7    |          | SK-Hep-1 |          |
|------------------------------|------------------------------------------|---------------|-----------|----------|----------|----------|----------|----------|
|                              |                                          |               | Fold      | p (n=3)  | Fold     | p (n=3)  | Fold     | p (n=3)  |
| Sorafenib target genes (STG) | LRCC treated with vs. without metformin  | <b>AIFM1</b>  | -1.5566   | 0.005484 | -28.3518 | 0.000002 | -7.5412  | 0.000531 |
|                              |                                          | <b>AKT1</b>   | -1.5232   | 0.000125 | -13.0878 | 0.000007 | -6.9684  | 0.000301 |
|                              |                                          | <b>BAD</b>    | -1.486    | 0.009121 | -36.4613 | 0.000008 | -14.8511 | 0.00044  |
|                              |                                          | <b>BRAF</b>   | -1.9086   | 0.000374 | -3.3783  | 0.000639 | -4.1417  | 0.026333 |
|                              |                                          | <b>CYP2B6</b> | -3.7585   | 0.000005 | -7.9119  | 0.001761 | -3.1632  | 0.031615 |
|                              |                                          | <b>DDIT3</b>  | 1.2973    | 0.012283 | -7.9021  | 0.000442 | -8.8692  | 0.005534 |
|                              |                                          | <b>ERN1</b>   | -2.5778   | 0.000006 | -121.427 | 0.000013 | -5.5008  | 0.053132 |
|                              |                                          | <b>FLT4</b>   | -1.6225   | 0.000037 | -2.9696  | 0.000027 | -3.6601  | 0.002009 |
|                              |                                          | <b>HSPA5</b>  | -1.6148   | 0.000305 | -2.5155  | 0.00001  | -8.4929  | 0.00243  |
|                              |                                          | <b>MAPK3</b>  | -1.356    | 0.00573  | -35.7244 | <0.0001  | -9.1404  | 0.004722 |
|                              |                                          | <b>SNRPE</b>  | -1.601    | 0.001774 | -10.0919 | 0.001488 | -6.2677  | 0.000818 |
|                              | <b>STAT5B</b>                            | -1.9913       | 0.000051  | -6.313   | 0.015942 | -6.6857  | 0.002185 |          |
|                              | LRCC vs. non-LRCC treated with metformin | <b>RET</b>    | -1.2245   | 0.00573  | 152.0224 | 0.000002 | 2041.346 | 7E-05    |
| <b>STAT5A</b>                |                                          | -2.0447       | 0.003308  | 2.7784   | 0.000081 | 10150.05 | 5E-05    |          |
| <b>AKT3</b>                  |                                          | 1.3922        | 0.004113  | 48842.06 | <0.0001  | 8733.125 | 1E-05    |          |
| Wnt pathway genes            | LRCC treated with vs. without metformin  | <b>JUN</b>    | 5.736     | 0.000038 | 6.0981   | 0.001223 | -1.2868  | 0.290592 |
|                              |                                          | <b>T</b>      | 17.4039   | 0.000011 | 14.5775  | 0.148129 | -1.1451  | 0.718597 |
|                              |                                          | <b>WNT3A</b>  | 1.8616    | 0.002701 | 25.9864  | 0.002667 | 1.2233   | 0.507343 |
|                              | LRCC vs. non-LRCC treated with metformin | <b>BCL9</b>   | 2.2032    | 0.00831  | 21.215   | 0.01186  | 1.1564   | 0.128631 |
|                              |                                          | <b>CCND2</b>  | 2.1015    | 0.025836 | 46.0205  | 0.185847 | 2.8943   | 0.000165 |
|                              |                                          | <b>FZD6</b>   | -2.3446   | 0.584478 | 56.8878  | 0.007316 | 2.2573   | 0.025851 |
|                              |                                          | <b>T</b>      | 45.1072   | 0.000009 | 78.6364  | 0.134719 | 3.3258   | 0.218266 |
|                              |                                          | <b>TCF7</b>   | 2.0259    | 0.022989 | 41.5275  | 0.056949 | 1.2873   | 0.374777 |
|                              |                                          | <b>WNT3A</b>  | 1.9412    | 0.000486 | 92.3291  | 0.002359 | 1.3643   | 0.36917  |
|                              |                                          | <b>WNT9A</b>  | 2.697     | 0.016636 | 278.1328 | 0.005638 | 2.4228   | 0.163662 |
| Stem cell genes              | LRCC treated with vs. without metformin  | <b>ACTC1</b>  | -20.634   | 0.000122 | -2.4106  | 0.380996 | -9.5657  | 0.00161  |
|                              |                                          | <b>BMP1</b>   | 1.6534    | 0.003246 | 6.7637   | 0.000536 | 2.0386   | 0.009662 |
|                              |                                          | <b>CDH2</b>   | 1.9097    | 0.000599 | 10.7765  | 0.005712 | 3.6674   | 0.000275 |
|                              |                                          | <b>FGF1</b>   | 1.39      | 0.007495 | 6.6334   | 0.012208 | 2.9986   | 0.02268  |
|                              |                                          | <b>FGF3</b>   | -26.057   | 0.045246 | -1.7166  | 0.353731 | -9.5657  | 0.00161  |
|                              |                                          | <b>MYOD1</b>  | -3.512    | 0.002061 | -13.531  | 0.003711 | -9.5657  | 0.00161  |
|                              |                                          | <b>NCAM1</b>  | 4.0258    | 0.002352 | 149.6703 | 0.005729 | 41.305   | 0.000367 |
|                              |                                          | <b>SOX1</b>   | -65.939   | 0.001062 | 1.1098   | 0.427311 | -9.5657  | 0.00161  |
|                              |                                          | <b>WNT1</b>   | 0.00588   | -49.3374 | 0.001274 | -35.4335 | 0.002284 | -9.5657  |
|                              | LRCC vs. non-LRCC treated with metformin | <b>APC</b>    | 3.0711    | 0.0012   | 1.5201   | 0.162344 | 6.5218   | 0.0161   |
|                              |                                          | <b>AXIN1</b>  | 1.3003    | 0.099888 | 5.4881   | 0.000017 | 10.6449  | <0.0001  |
|                              |                                          | <b>BMP1</b>   | 1.5539    | 0.076555 | 6.4285   | 0.002602 | 6.5993   | 0.0002   |
|                              |                                          | <b>BTRC</b>   | 2.9925    | 0.000775 | -1.3023  | 0.243131 | 15.4317  | 0.0014   |
|                              |                                          | <b>CDC42</b>  | 4.4185    | 0.000046 | -1.4012  | 0.079848 | 14.8405  | <0.0001  |
|                              |                                          | <b>CTNNA1</b> | 4.4276    | 0.000103 | 1.3365   | 0.112555 | 16.5218  | 4E-05    |
|                              |                                          | <b>DHH</b>    | 2.8455    | 0.002048 | 194.384  | 0.001598 | 50.0828  | <0.0001  |
|                              |                                          | <b>DLL3</b>   | 2.2096    | 0.022045 | 209.2689 | 0.009388 | 23.617   | 2E-06    |
|                              |                                          | <b>DTX2</b>   | 2.6278    | 0.00055  | -1.3011  | 0.029051 | 18.6543  | 4E-06    |
|                              |                                          | <b>FGF1</b>   | 1.8868    | 0.006508 | 14.3148  | 0.009008 | 4.2604   | 0.0148   |
|                              |                                          | <b>FGFR1</b>  | 28.7767   | 0.000048 | 2.4383   | 0.125253 | 17.7309  | 0.002    |
|                              |                                          | <b>NCAM1</b>  | 6.7644    | 0.001555 | 1.244    | 0.687532 | 289.8034 | 0.0004   |
|                              |                                          | <b>NOTCH2</b> | 8.1047    | 0.000211 | 1.5142   | 0.562791 | 10.7287  | 0.0002   |
| <b>TUBB3</b>                 | 6.9841                                   | 0.000247      | 4.5177    | 0.003547 | 43.5701  | 3E-06    |          |          |
| <b>KLF4</b>                  | 9.4146                                   | <0.0001       | 7.9201    | 0.000002 | 12.6198  | 0.000024 |          |          |
| <b>OCT4</b>                  | 3.1611                                   | 0.000146      | 1.4178    | 0.087766 | 7.556    | 0.000006 |          |          |
| <b>BMI1</b>                  | 1.9002                                   | 0.000002      | 4.3709    | 0.000196 | 11.0354  | 0.000005 |          |          |

## Supplementary Note

**The LKB1/AMPK/mTOR pathway:** The liver kinase B1 (LKB1) regulates the AMP-activated kinase (AMPK). Metformin activates AMPK. Activated AMPK inhibits the mammalian target of rapamycin (mTOR). mTOR controls protein synthesis and cell proliferation.
